# Supplementary material for: Vapor-phase preparation of single-crystalline thin gold microplates using HAuCl4 as the precursor for plasmonic applications
Source: Royal Society of Chemistry journal article supplement (doi:10.1039/c6ra15909e), 2016-01-01
Supplement: c6ra15909e1.pdf [file c6ra15909e1.pdf]

## Electronic Supplementary Information

### **Vapor-phase preparation of single-crystalline thin gold microplates using H<sub>2</sub>AuCl<sub>4</sub> as the precursor for plasmonic applications**

Xuejiao Wang<sup>1</sup>, Yiqin Chen<sup>1</sup>, Xupeng Zhu<sup>1</sup>, Zhiqin Li<sup>1</sup>, Zhengang Shang<sup>2</sup>, Huigao Duan<sup>1\*</sup>

<sup>1</sup>School of Physics and Electronics, State Key Laboratory for Chemo/Biosensing and Chemometrics, Hunan University, Changsha, Hunan 410082, P. R. China.

<sup>2</sup>Institute for Materials Microstructure Research, Advanced Research Center, Central South University, Changsha, Hunan 410082, P. R. China.

\*Email: [duanhg@hnu.edu.cn](mailto:duanhg@hnu.edu.cn).

**KEY WORDS:** vapor-phase deposition, gold microplates, pyrolysis, chloroauric acid, plasmon resonance

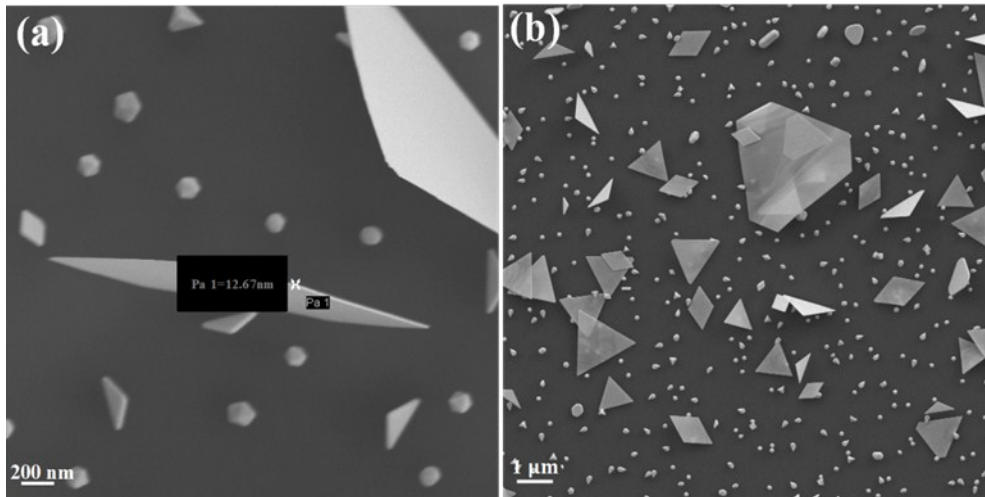

**Fig. S1** (a, b) SEM images of gold microplates to demonstrate the thickness of our products are thin.

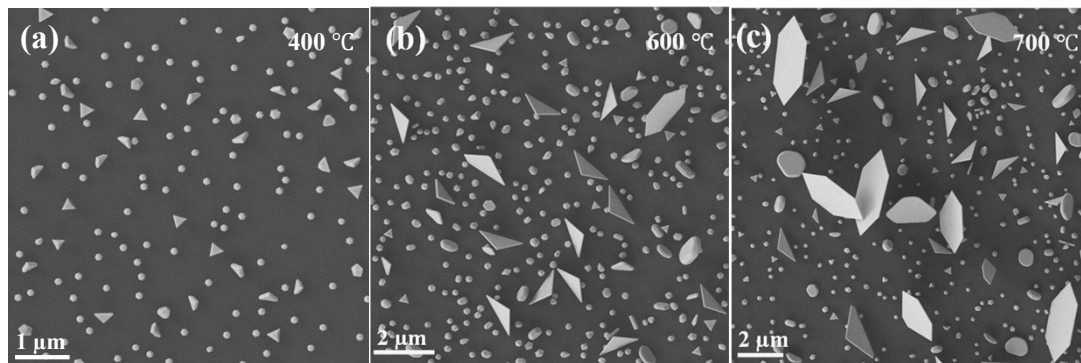

**Fig. S2** The SEM images of gold microplates synthesized at different deposition temperature of 400 °C (a), 600 °C (b) and 700 °C (c). The in-tube pressure was kept at 850 mTorr. The source-to-substrate distance was set as 3 cm. The result at 500 °C was shown in figure 4.

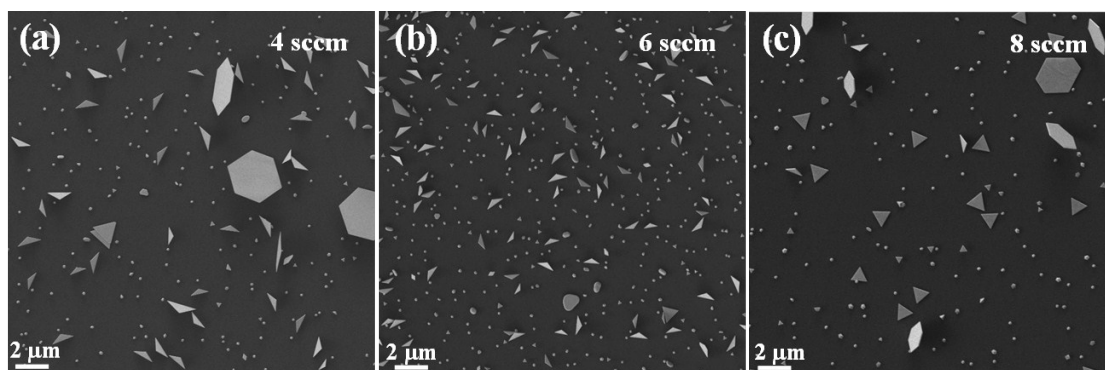

**Fig. S3** The SEM images of gold microplates synthesized at different flow rate of N<sub>2</sub> of 4 sccm (a), 6 sccm (b) and 8 sccm (c). The deposition temperature was 500 °C. The source-to-substrate

distance was set as 3 cm. The result of 2 sccm was shown in figure 4.

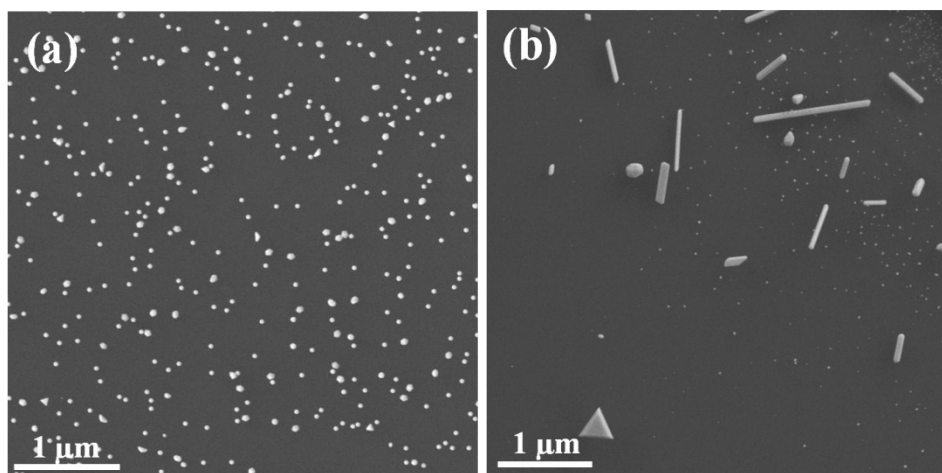

**Fig. S4** The SEM images of gold nanocrystal with different shapes. (a) nanoparticles. (b) nanorods.

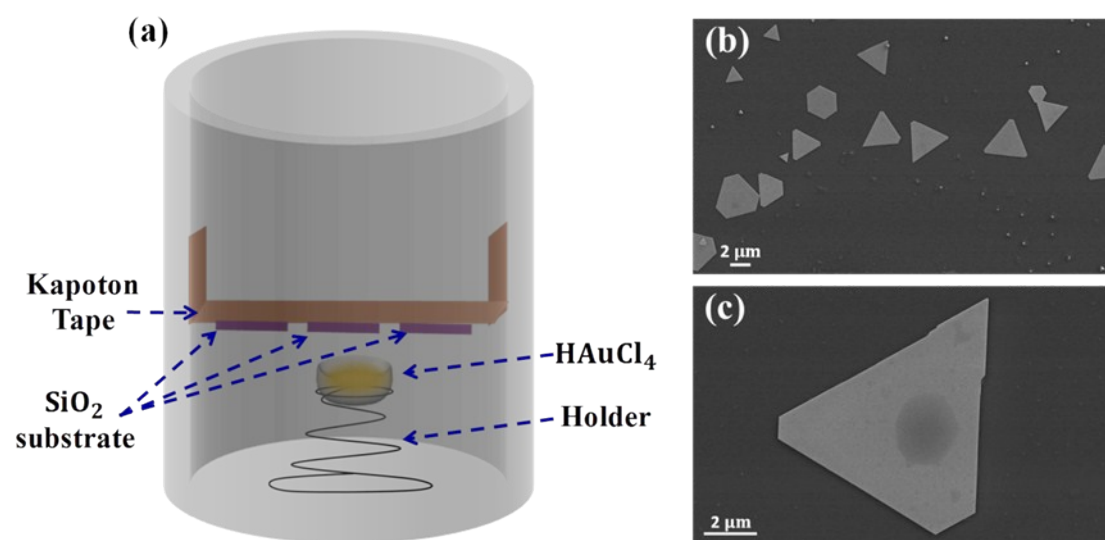

**Fig. S5** (a) The schematic of a home-made reaction kettle equipment. (b, c) the obtained gold microplates.

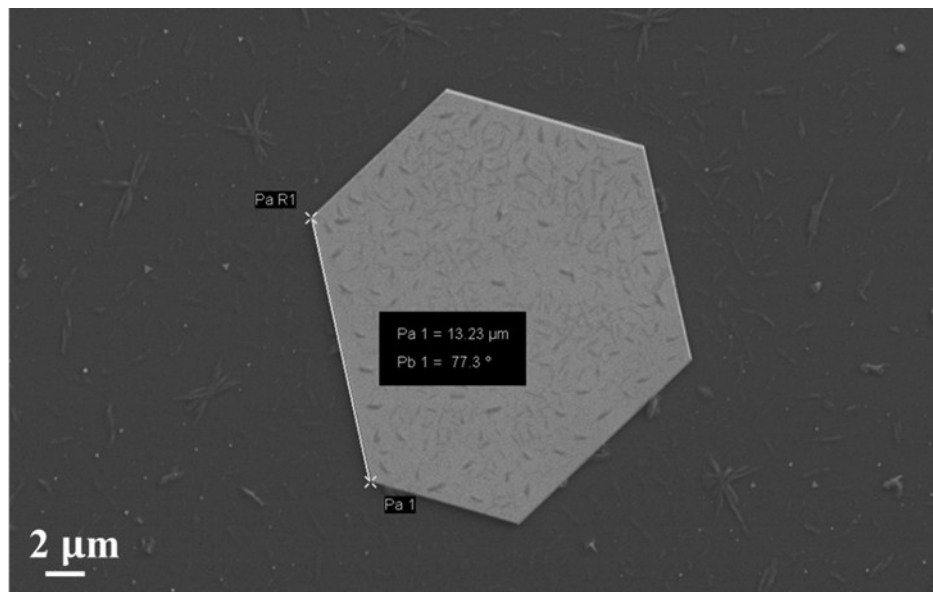

**Fig. S6** The SEM image of a large gold microplate obtained using the home-made reaction kettle equipment.
